# Supplementary material for: Spectral Demultiplexing in Holographic and Fluorescent On-chip Microscopy
Source: PubMed Central journal article supplement — Sci Rep. 2014 Jan 20;4:3760. doi: 10.1038/srep03760 (PMC3895906; doi:10.1038/srep03760), 2014-01-20
Supplement: srep03760-s1.pdf [file srep03760-s1.pdf]

## SUPPLEMENTARY INFORMATION

### SPECTRAL DEMULTIPLEXING IN HOLOGRAPHIC AND FLUORESCENT ON-CHIP MICROSCOPY

Ikbal Sencan,<sup>1</sup> Ahmet F. Coskun,<sup>1</sup> Uzair Sikora,<sup>1</sup> Aydogan Ozcan,<sup>1,2,3,\*</sup>

<sup>1</sup> Electrical Engineering Department, University of California Los Angeles, Los Angeles, California, United States of America

<sup>2</sup> Bioengineering Department, University of California Los Angeles, Los Angeles, California, United States of America

<sup>3</sup> California NanoSystems Institute, University of California Los Angeles, Los Angeles, California, United States of America

\* [ozcan@ucla.edu](mailto:ozcan@ucla.edu)

**This file includes:**

Supplementary Figures S1 and S2

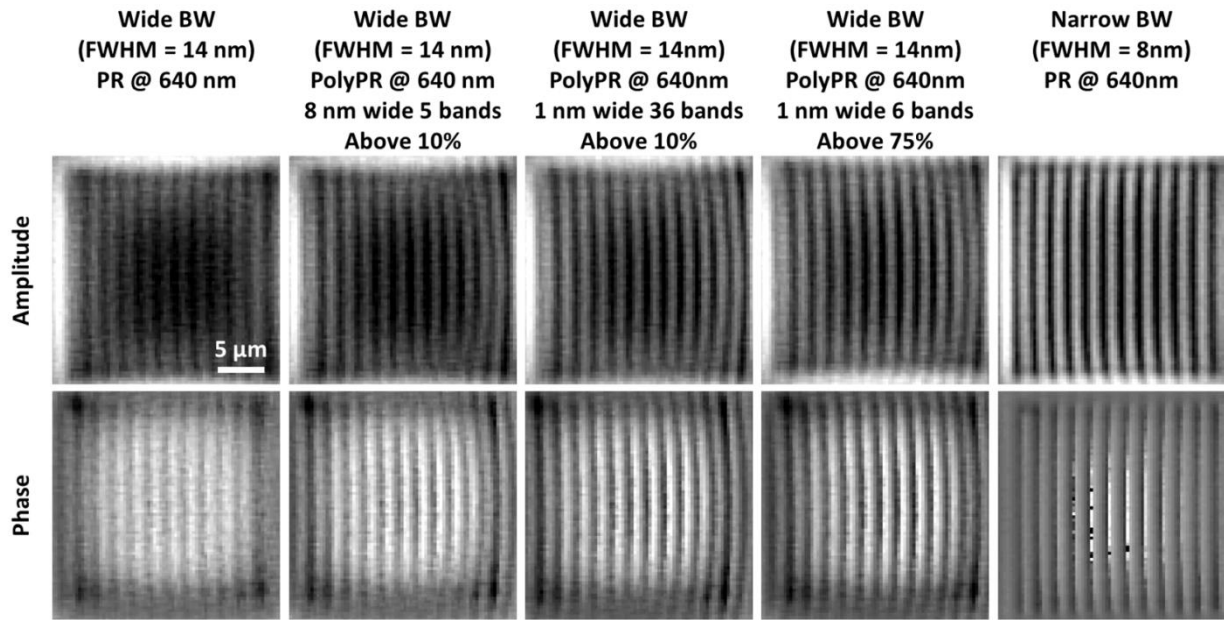

**Supplementary Figure S1. Reducing the computational load of PolyPR.** (2<sup>nd</sup> and 3<sup>rd</sup> columns) PolyPR performed better with narrower bandwidths at the cost of increased number of bands. (3<sup>rd</sup> and 4<sup>th</sup> columns) Limiting the PolyPR to the narrow bands (~1 nm each) that are above 75% of the normalized spectral intensity did not degrade the recovery performance, and yet significantly reduced the computational load due to reduced number of bands used in the recovery process.

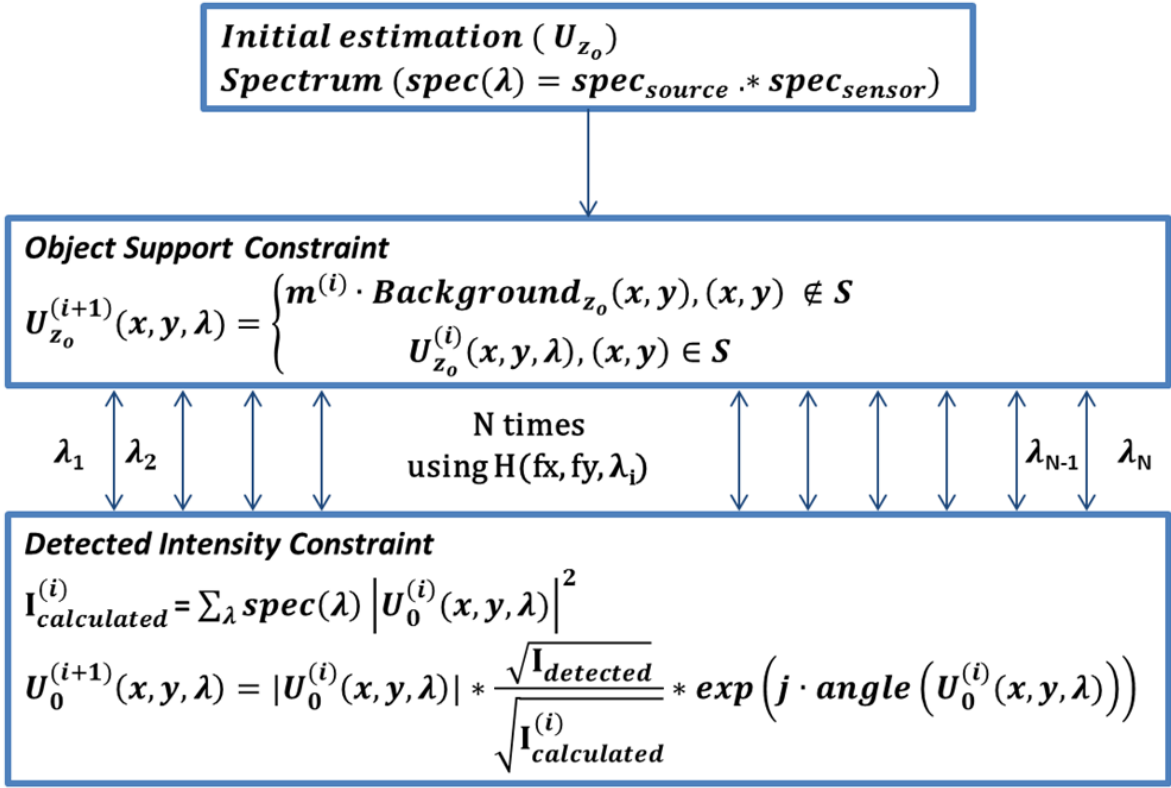

**Object Support, S**

The field at object level ( $z = z_0$ )  $i^{th}$  iteration,  $U_{z_0}^{(i)}(x, y, \lambda)$

The field at detector level ( $z = 0$ )  $i^{th}$  iteration,  $U_0^{(i)}(x, y, \lambda)$

$$m^{(i)} = \text{mean}(U_{z_0}^{(i)}(x, y, \lambda)) / \text{mean}(Background_{z_0}(x, y))$$

$$H(f_x, f_y, \lambda) = \begin{cases} exp\left(j2\pi z \left(\frac{n}{\lambda}\right) \sqrt{1 - \left(\frac{\lambda f_x}{n}\right)^2 - \left(\frac{\lambda f_y}{n}\right)^2}\right), & \sqrt{f_x^2 + f_y^2} < \frac{n}{\lambda} \\ 0, & \text{otherwise} \end{cases}$$

**Supplementary Figure S2. Detailed schematic of the PolyPR method based on the object-support constraint.** This PolyPR process does not assume wavelength-invariant objects.
